# Supplementary material for: Combined optical and electrical control of a low-power consuming (∼fJ) two-terminal organic artificial synapse for associative learning and neuromorphic applications
Source: Royal Society of Chemistry journal article supplement (doi:10.1039/d4nr02673j), 2024-01-01
Supplement: d4nr02673j1.pdf [file d4nr02673j1.pdf]

## SUPPLEMENTARY INFORMATION

Title : Combined optical and electrical control of a low-power consuming ( ~ fJ) two-terminal organic artificial synapse for associative learning and neuromorphic applications

<sup>1</sup>Amrita Bharti Mishra., and <sup>2\*</sup>R. Thamankar

<sup>1</sup>Department of Physics, School of Advanced Sciences, Vellore Institute of Technology, Vellore, Tamilnadu - 632014. India.

<sup>2</sup>Centre for Functional Materials, Vellore Institute of Technology, Vellore, Tamilnadu 632014, India.

\*Corresponding author

E-mail address: [rameshm.thamankar@vit.ac.in](mailto:rameshm.thamankar@vit.ac.in)

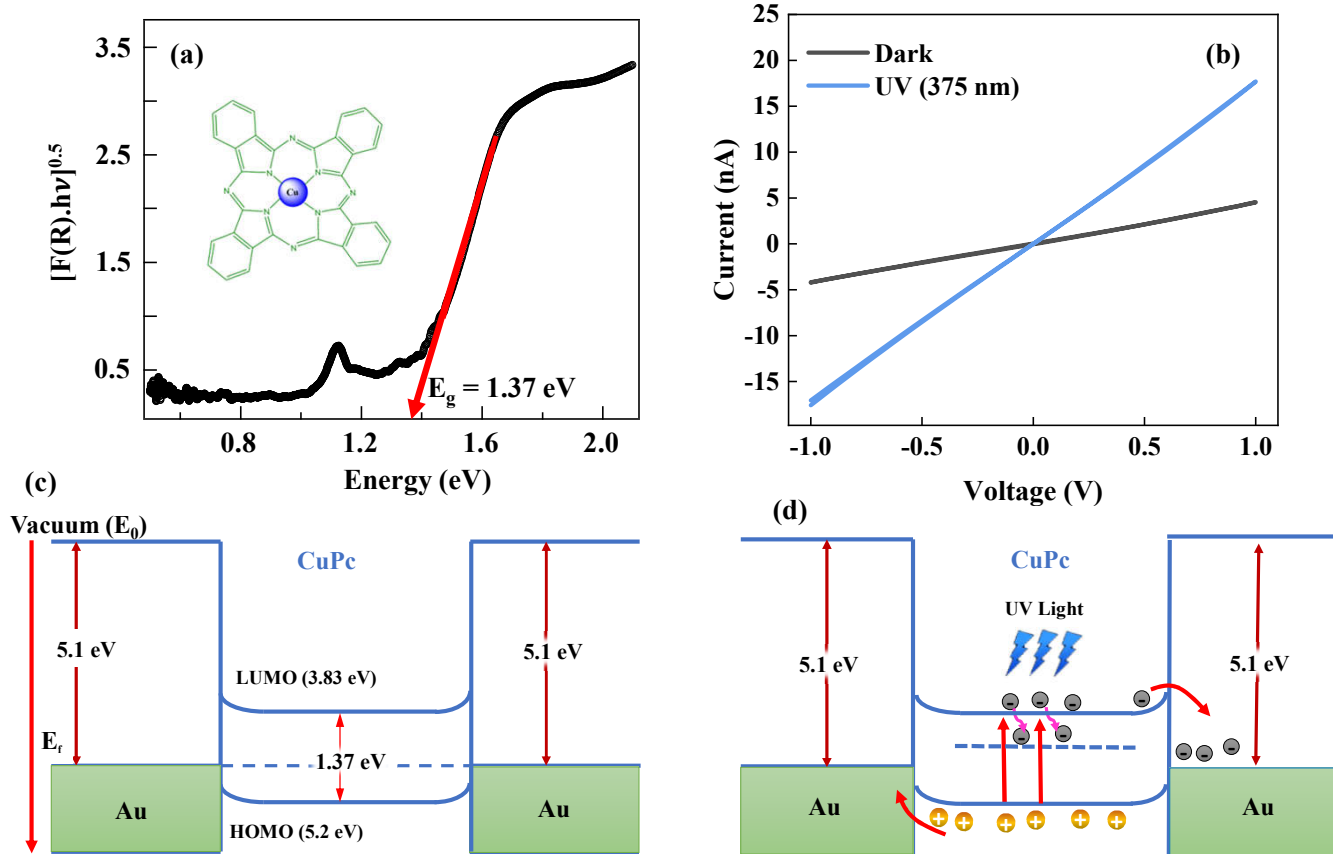

Figure S1 : (a) Kubelka – Munk function for calculation of optical energy gap of CuPc. The optical energy gap  $\sim 1.37$  eV, which is extracted from the linear extrapolation of the Kubelka – Munk function (b) Typical I-V curve at 1V in the dark and under 375 nm UV light. (c) Stationary energy level diagram of Au-CuPc-Au in the dark (d) The Energy level diagram when synaptic device is exposed to UV-light.

### **Note S1. Calculation of Energy consumption per spike in the CuPc optical synapse**

Energy consumption per spike can be evaluated using the standard computation

$$dE = V_{\text{read}} \times I \times dt ;$$

Here, '**V**' is the read voltage of the device, '**I**' is the current produced by the device and '**dt**' is the duration of the optical spike. We use the read voltage here as the device is stimulated using optical pulses. In this case, the energy consumption is the energy corresponding to the electrical response of an optoelectronic synaptic device.

For Example: with the use of an optical pulse of  $dt = 40 \text{ ms}$ ;  $V_{\text{read}} = 0.1 \text{ Volts}$

Energy consumption by the device:

$$dE = V \times I \times dt = 0.1 \text{ V} \times 0.1076 \times 10^{-9} \text{ A} \times 0.04\text{s} = 430.4 \text{ fJ}$$

By reducing the  $dt$  to less than 1 ms, the energy consumption can be reduced to less than 100 fJ.

**Table 1 : Energy consumption per spike for various devices. The organic/organic-inorganic optical synapses are listed in this table**

| Active Material                              | Type              | Device structure | Wavelength        | Synaptic functionalities                                                          | Energy Consumption | References      |
|----------------------------------------------|-------------------|------------------|-------------------|-----------------------------------------------------------------------------------|--------------------|-----------------|
| C8-BTBT                                      | Organic           | Three Terminal   | 360 nm            | STP/LTP                                                                           | ~ 42 nJ            | 1               |
| (PEA) <sub>2</sub> SnI <sub>4</sub>          | Organic-inorganic | Two Terminal     | 470 nm            | STP/LTP                                                                           | ~ 9 nJ             | 2               |
| CsPbBr <sub>3</sub> QDs/PQT-12               | Organic-Inorganic | Three Terminal   | 500 nm            | STP/LTP                                                                           | ~ 0.65 nJ          | 3               |
| MoS <sub>2</sub> /PTCDA                      | Organic-Inorganic | Three Terminal   | 532 nm            | STP/LTP                                                                           | ~ 10 pJ            | 4               |
| C <sub>3</sub> N <sub>4</sub>                | Organic           | Three Terminal   | UV.               | SDDP/SNDP/light intensity dependent plasticity                                    | ~ 18.06 fJ         | 5               |
| PEDOT:PSS/PDPP 4T/CsPbBr <sub>3</sub> /SWCNT | Organic-Inorganic | Three Terminal   | UV-vis            | EPSC/STP/LTP/Image processing                                                     | ~ 1.3 fJ           | 6               |
| CuPc@PMMA                                    | Organic           | Two Terminal     | Visible           | STM/LTM                                                                           | ~ 0.3 μJ           | 7               |
| P(VDF-TrFE)/CuPc                             | Organic           | Two terminal     | 445 nm and 660 nm | EPSC/IPSC/PPF/Pain perception                                                     | ~ 40 nJ            | 8               |
| In/MoS <sub>2</sub>                          | Inorganic         | Two terminal     | 550 nm            | STP/LTP/Image learning                                                            | ~ 68.9 aJ          | 9               |
| CuPc                                         | Organic           | Two Terminal     | UV-375 nm         | STP/LTP/SDDP/SNDP/SRDP /light intensity dependent plasticity/Associative learning | ~ 430 fJ           | <b>Our Work</b> |

Reference 9 is an complete inorganic synaptic device, but it has been kept for a comparative study.

1. S. Dai, X. Wu, D. Liu, Y. Chu, K. Wang, B. Yang and J. Huang, ACS Applied Materials & Interfaces, 2018, 10, 21472–21480.
2. L. Qian, Y. Sun, M. Wu, C. Li, D. Xie, L. Ding and G. Shi, Nanoscale, 2018, 10, 6837–6843.
3. K. Wang, S. Dai, Y. Zhao, Y. Wang, C. Liu and J. Huang, Small, 2019, 15,.
4. S. Wang, C. Chen, Z. Yu, Y. He, X. Chen, Q. Wan, Y. Shi, D. Zhang, H. Zhou, X. Wang and P. Zhou, Advanced Materials, 2018, 31, 1806227.
5. H.-L. Park, H. Kim, D. Lim, H. Zhou, Y.-H. Kim, Y. Lee, S. Park and T.-W. Lee, Advanced Materials, 2020, 32, 1906899
6. T. Chen, X. Wang, D. Hao, S. Dai, Q. Ou, J. Zhang and J. Huang, Advanced Optical Materials, 2021, 9, 2002030.
7. B. Das, M. Samanta, P. Sarkar, U. K. Ghorai, A. Mallik and K. K. Chattopadhyay, Advanced Electronic Materials, 2021, 7, 2001079.
8. R. Ji, G. Feng, C. Jiang, B. B. Tian, C. Luo, H. Lin, X. Tang, H. Peng and C.-G. Duan, Advanced Electronic Materials, 2022,
9. Y. Hu, M. Dai, W. Feng, X. Zhang, F. Gao, S. Zhang, B. Tan, J. Zhang, Y. Shuai, Y. Fu and P. Hu, Advanced Materials, 2021,33, 2104960.

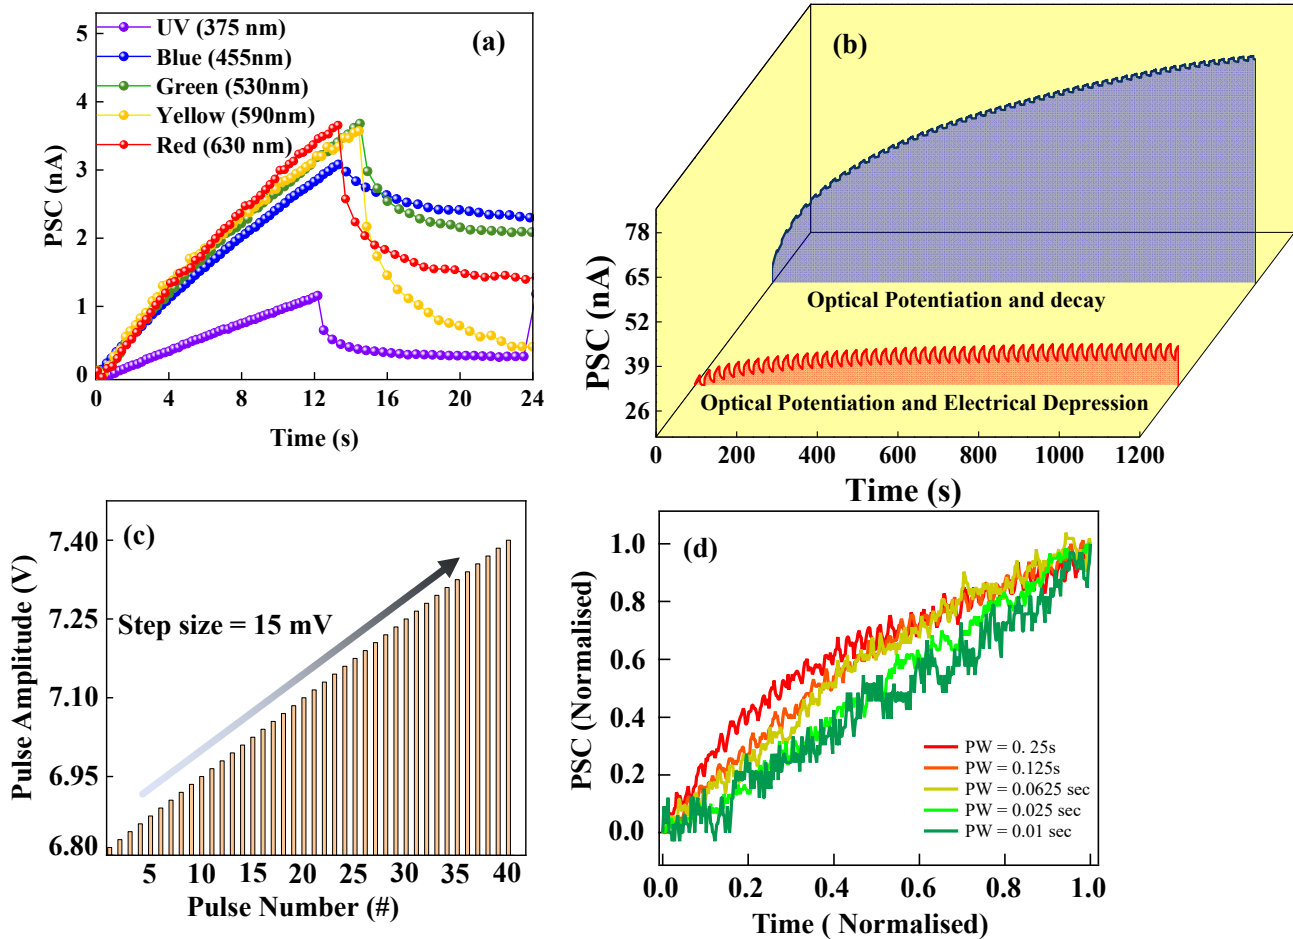

Figure S2 : (a) Optical potentiation using LEDs of various wavelength (starting from UV, Blue, Green, Yellow, Red). The intensity of UV LED was  $32.45 \mu\text{W}/\text{cm}^2$  and all other LEDs were  $3.16 \text{ mW}/\text{cm}^2$ . (b) 3D representation of 50 cycles of optical potentiation and normal decay along side optical potentiation and electrical depression using negative pulse ( $V_r = 1\text{V}$ ,  $V_p = -0.5\text{mV}$ ) (c) Effect of non-linear pulse sequence on potentiation. (a) The non-ideal optical pulses being applied for potentiation, 40 pulses having pulse amplitude varying from 6.8 V to 7.4 V with each step increasing by 0.015 V. (b) Non-linear to linear synaptic weight update by utilization of non-ideal pulse sequence. The PSC is measured for variable light pulse duration as shown. The faster pulsing (PW = 0.01 sec) leads us a linear weight update.

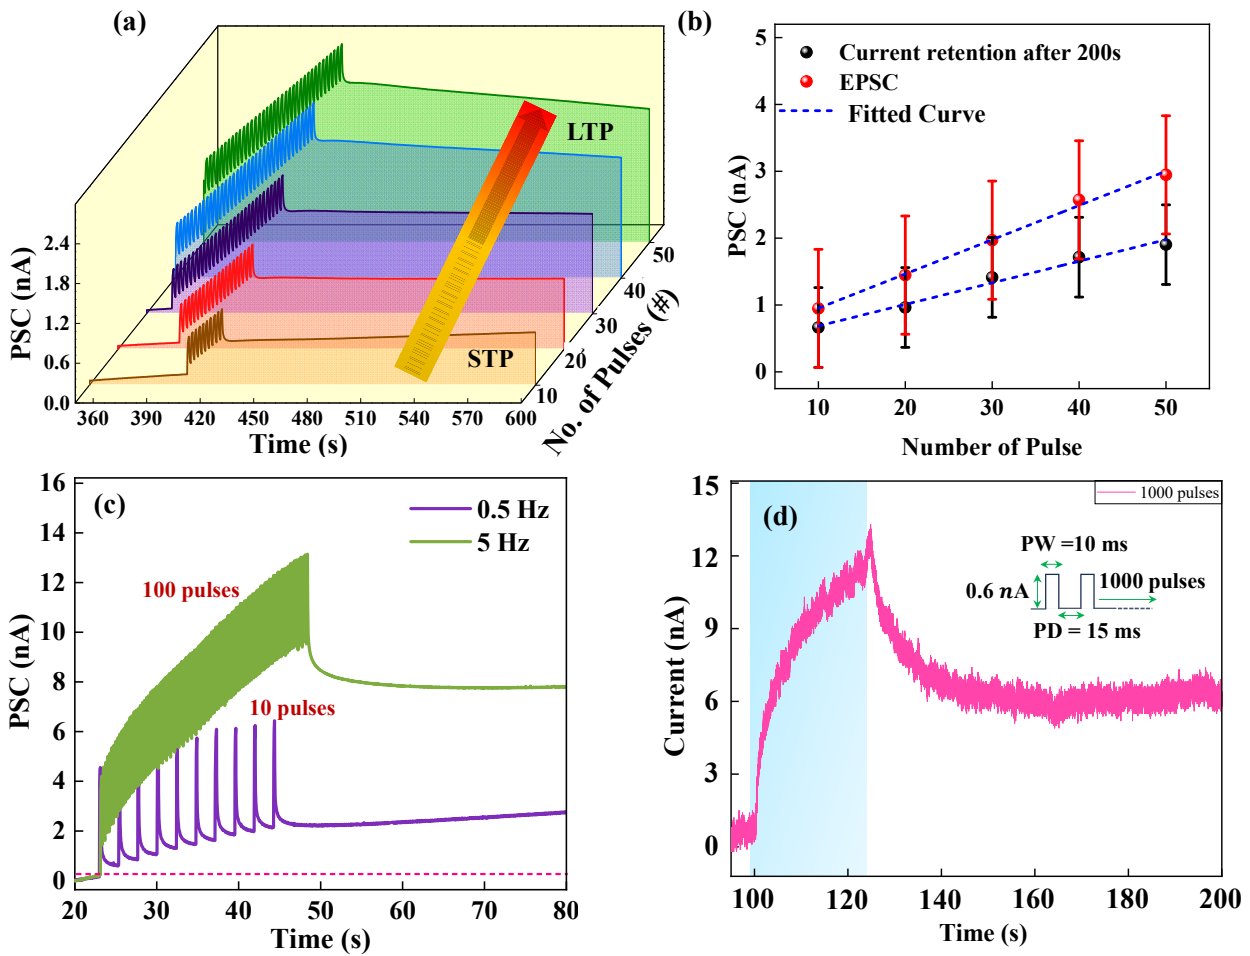

Figure S3 :(a) Transition from STP to LTP induced by increasing the number of pulses for a given UV light intensity  $32.45 \text{ mW/cm}^2$  (b) The change in the EPSC and current retention (after 200s) with the number of optical light pulses (c) EPSCs with 375 nm light spiking at frequencies of 0.5 and 5 Hz for a duration of 20 s. This measurement shows by increasing the frequency by 10 folds EPSC has increased from 6.4 nm to 13.1 nm and current retention after 20 secs have increased from 2.5 nm to 7.7 nm. (d) Potentiation of the CuPc synapse by using 1000 optical pulses of intensity  $32.45 \mu\text{W/cm}^2$  and pulse width 10 msec

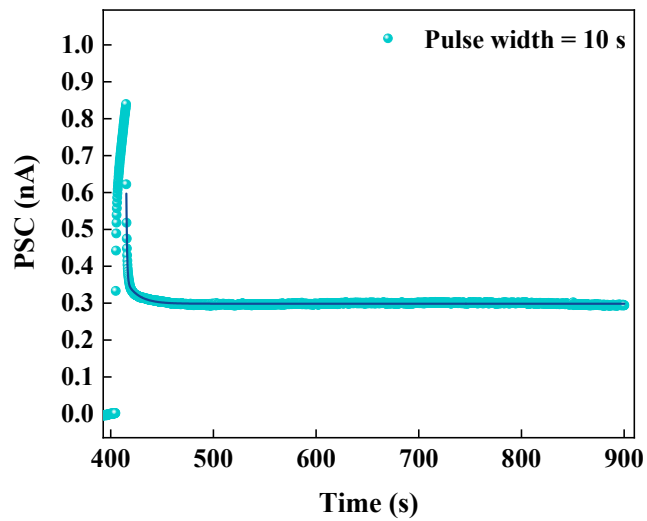

Fig. (S4) : Long-term potentiation observed in the case of optical stimulation. Pulse width =10 sec, Wavelength : 375 nm. Intensity  $32.45\mu\text{W}/\text{cm}^2$ . The retained memory after 500 sec is about 35% and after one hour, it is about 26%.
